# Supplementary material for: Diagnostic Laboratory Characteristics of COVID-19 Patients Infected by Fomites: COVID-19 Outbreak in a South Korean Public Administrative Facility
Source: MDPI journal article supplement (doi:10.3390/pathogens11060700), 2022-06-17
Supplement: s1 [file s1]

Case 1  
58/ M

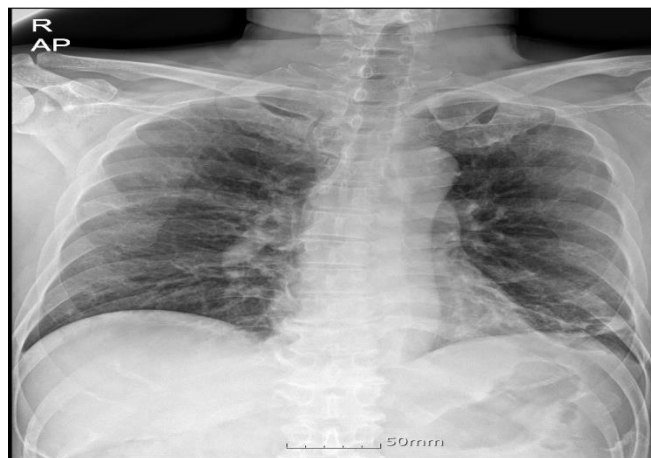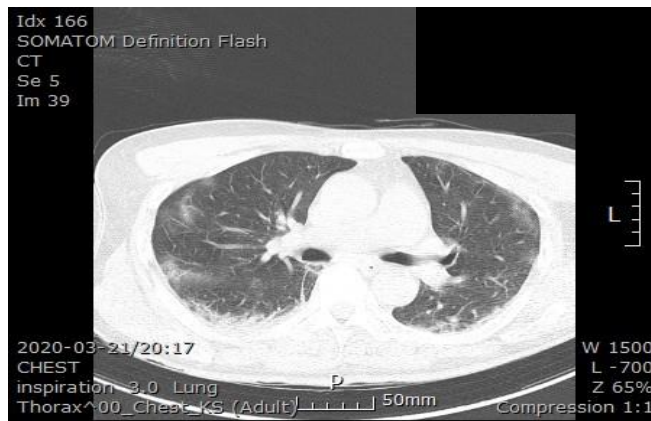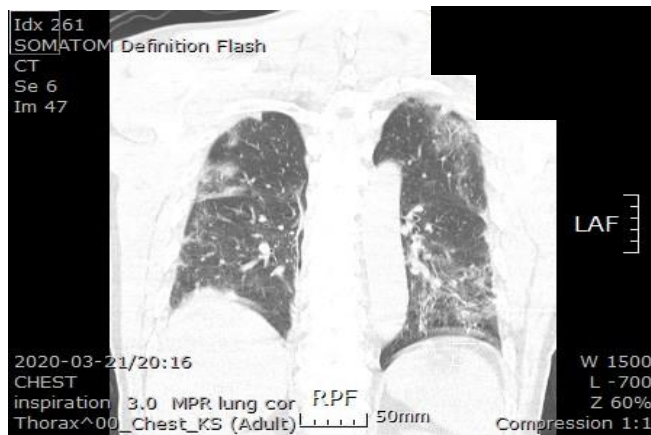

Case 2  
59/ F

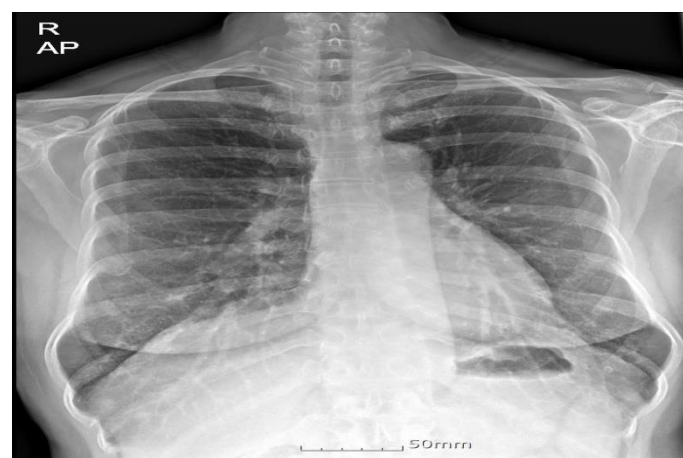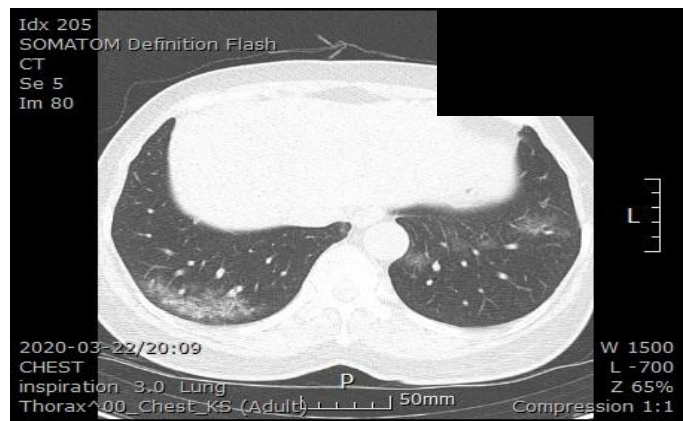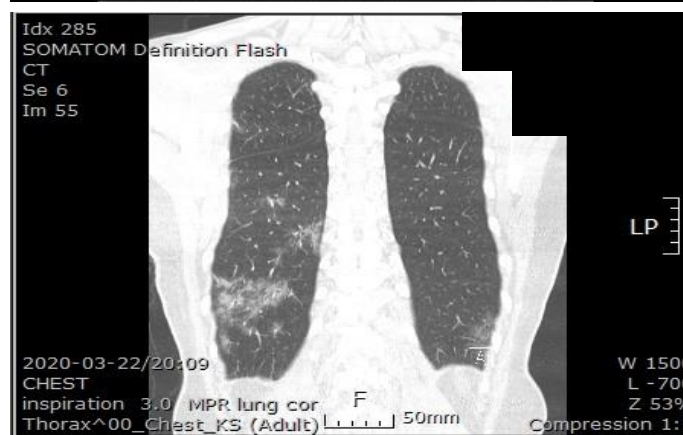

Figure S1. Plain chest radiograph and CT scan images of SARS-CoV2 office cleaner patients
